1 **Clay-induced DNA double-strand breaks underlay genetic diversity, antibiotic resistance and**  
2 **could be a molecular basis for asbestos-induced cancer**

3

4 Enrique González-Tortuero<sup>1,2,§</sup>, Jerónimo Rodríguez-Beltrán<sup>3</sup>, Renate Radek<sup>4</sup>, Jesús Blázquez<sup>3</sup> and  
5 Alexandro Rodríguez-Rojas<sup>4\*</sup>

6

7 <sup>1</sup>Department of Ecosystem Research, Leibniz-Institute of Freshwater Ecology and Inland Fisheries  
8 (IGB), Müggelseedamm 301, 12587 Berlin, Germany.

9 <sup>2</sup>Berlin Centre for Genomics in Biodiversity Research (BeGenDiv), Königin-Luise-Straße 6-8,  
10 14195 Berlin, Germany.

11 <sup>3</sup>Institut für Biologie, Freie Universität Berlin. Königin-Luise-Str. 1-3 14195 Berlin, Germany.

12 <sup>§</sup>Current Address: APC Microbiome Institute, University College Cork, T12 R229 Cork, Ireland.

13 <sup>4</sup>Evolutionary Biology, Institut für Biologie, Freie Universität Berlin, Berlin, Germany

14

15 \* Author to whom correspondence should be addressed: a.rojas@fu-berlin.de

16

17 **Abstract**

18

19 Some natural clays and synthetic nanofibres present in the environment have a severe impact on  
20 human health. After several decades of research, the molecular mechanism of how asbestos induce  
21 cancers is not well understood. Different fibres, including asbestos, can penetrate the membrane and  
22 introduce DNA in both, bacterial and eukaryotic cells. Incubating *Escherichia coli* with sepiolite, a  
23 clayey material, and asbestos under friction forces, both fibres cause double-strand breaks in  
24 bacteria. Since antibiotics and clays are used together in animal husbandry, the mutagenic effect of  
25 these fibres might constitute a pathway to antibiotic resistance due to the friction provided by  
26 peristalsis of the gut from farm animals in addition to the previously proposed horizontal gene  
27 transfer. Moreover, we raise the possibility that the same mechanism could generate bacteria  
28 diversity in natural scenarios with a role in the evolution of species. Finally, we provide a new  
29 model on how asbestos may promote mutagenesis and cancer based on the observed mechanical  
30 genotoxicity.

31

32 **Keywords:** sepiolite, mutagenesis, antibiotic resistance, double-strand break, microbiota evolution,  
33 genetic diversity, asbestos, asbestosis, carcinogenesis

34

## 35 **Introduction**

36

37 Clays such as sepiolite are jointly used with antibiotics in farming as growth promoters. This  
38 practice improves growth and animal product quality, and these additives are common in feed for  
39 broiler chickens and pigs [1,2]. Sepiolite is considered to be safe, stable and chemical inert hence  
40 being also used in tablet formulation for human medicine [3]. However, in a recent study clays used  
41 as animal feed additive can increase the risk of horizontal gene transfer (HGT) among microbes,  
42 resulting possibly in a rise of antibiotic resistance [4,5].

43

44 In this case, the transformation of bacteria by foreign DNA can be achieved when clay fibres are  
45 spread by friction or vibrations. This phenomenon is known as Yoshida effect [6] and relies on the  
46 ability of mineral nanofibres or nano-needles to adsorb DNA and to penetrate bacterial cells under  
47 sliding friction forces [7]. By its mechanical nature, the Yoshida effect can be used to transform  
48 diverse bacterial species [5,8,9]. The action of sepiolite and other clays fibres is not only capable of  
49 delivering DNA into the receptor bacteria but also able to promote the releasing of DNA by  
50 disrupting the cell envelope of the portion of the population by the abrasive action of clays [5].

51

52 Before Yoshida began his experiments with bacteria, the ability of asbestos to transform eukaryotic  
53 cells was reported at the end of the eighties [10]. In fact, fibrous clays and industrial nanofibres are  
54 considered genotoxic and carcinogenic, likely due to their ability to damage DNA [11]. They have  
55 assayed in several experimental models including bacteria and cell in cultures, but they display a  
56 poor correlation with mutagenicity or carcinogenesis found *in vivo* [12,13]. According to these  
57 observations, a significant concern arises from fibrous clays or industrial nanofibres which are  
58 responsible for severe human diseases such as asbestosis [14]. However, short or long periods of  
59 exposure to fibres have been failing to identify a molecular basis of DNA damage in different  
60 several genotoxicity tests [14]. Thus, nowadays the mechanisms underlying the genotoxicity and  
61 carcinogenicity of asbestos and other fibres remain obscure.

62

63 Additionally, clays may have the potential to enhance antibiotic resistance in farming activities [4].  
64 In natural scenarios, sediments and stones (gastroliths) are frequently swallowed by animals  
65 resulting unavoidably in the exposure of their microbiota to pebbles, sand, and clays. Soils and  
66 waters are a primary source of antimicrobials, either by natural microbial production or  
67 environmental antibiotic pollution, a major selective pressure that favours resistant strains [15,16].  
68 Even, gut microbes can produce antibiotic compounds [17].

69 In this study, the ability of fibrous clays such as sepiolite and asbestos to transform bacteria and to  
70 induce mutagenic DNA double-strand breaks (DSBs) when they are exposed to friction forces was  
71 experimentally shown. Additionally, a molecular mechanism of action for asbestos, which was a  
72 strong inducer of DSBs in *Escherichia coli* when friction is present, was proposed. Finally, the  
73 importance of this mechanism is discussed for the speciation processes of animals that use  
74 gastroliths.

75

## 76 **Results and Discussion**

77

### 78 **Mutant frequency in sepiolite-treated cells is higher than in non sepiolite-treated cells.**

79 Different types of clays can transform bacteria by absorbing DNA and penetrating the cell  
80 envelope. In that case, the penetration could allow the clays to interact with the intracellular DNA  
81 and promote mutations. To test whether sepiolite under friction forces (as in transformation) has an  
82 impact on bacterial mutation rate, the mutant frequency of *Escherichia coli* was measured by  
83 plating in the antibiotic fosfomycin and enumerating spontaneous mutants (fig 1). When the cells  
84 were merely exposed to sepiolite without any friction on agar plates surface, no significant  
85 differences in mutant frequencies were detected (Mann-Whitney U test;  $P=0.999$ ). In contrast, a six-  
86 fold increase in mutant frequency was found when friction was present for two or three minutes  
87 (Mann-Whitney U test;  $P=0.008$ ) and a modest increase—but not significant—when the treatment  
88 time lasted for one minute (Mann-Whitney U test;  $P=0.421$ ). Interestingly, only cells in the  
89 stationary phase displayed an increase in mutant frequency (Kruskal-Wallis test;  $P=0.001$ ), while no  
90 significant mutagenesis was found when bacteria came from exponential cultures (Kruskal-Wallis  
91 test;  $P=0.954$ ; fig 1). Along with the mutant frequency experiments, the effect of the treatments on  
92 cell viability was checked. Sensitivity to the treatment is higher in exponential phase than in  
93 stationary phase cultures (fig 2). The observed mutant frequency differences was initially attributed  
94 to a higher sensitivity to the treatment. However, several hypotheses can explain the observed  
95 increase in mutant frequency and reduced-sensitivity in stationary phase cultures.

96

97 **Heavy metals are non relevant on sepiolite mutagenesis.** Many minerals containing metals such  
98 as iron, aluminium or copper are toxic for bacteria because of the generation of reactive oxygen  
99 species (ROS) via the Fenton reaction [18]. The release of metal ions inside the cell could therefore  
100 be the reason of the increase in mutagenesis. In fact, despite the addition of 2-2' bipyridyl, a  
101 chelating agent, shortly before treatment, mutagenesis was still observed (Kruskal-Wallis test;

102 P=0.008; fig S1). This result indicates that the mutagenic effect does not depend on the metals  
103 present in the fibres.

104

105 **Sepiolite interacts with the DNA by causing double-strand breaks.** A second likely explanation  
106 is the physical interaction of individual clay fibres in motion directly damaging DNA by creating  
107 DSBs. The ability of sepiolite fibres to penetrate and interact with DNA has already been stated  
108 [6,19]. Physical or mechanical stress on the DNA duplex is a relevant cause of DSBs [20]. To  
109 evaluate this possibility, *E. coli* DH5 $\alpha$  strain (*recA* deficient) carrying the plasmid (pET-19b) was  
110 subjected to treatment with sepiolite and sliding friction. Sepiolite without friction and bacterial  
111 cells alone were used as controls. The plasmid content was extracted, and its integrity was evaluated  
112 by gel migration (fig 3A). Typically, during plasmid DNA extraction, three molecular  
113 conformations are found: the supercoiled (which migrates very fast), nicked DNA (which is also  
114 closed circular but relaxed due to single strand breaks and it has an intermediate migration rate) and  
115 linear molecules (with a lower migration speed) [21]. These latter DNA molecules were especially  
116 abundant in the friction-sepiolite treated group at the time that they are present in a low level in  
117 control groups. In fact, plasmids from the sepiolite group (under friction) presented a significantly  
118 high level of linearised molecules when compared to the control groups (One-Way ANOVA test;  
119  $P=3.33\times 10^{-16}$ ). According to these results, the joint action of sepiolite and friction are responsible  
120 for induction of DSBs in the DNA. Interestingly, no increase in nicked DNA (single-strand break)  
121 was observed, indicating that if this type of lesion occurs, it happens at a non-detectable rate by this  
122 technique (fig 3B).

123

124 The view of mutagenic DSBs by mechanical shearing is very consistent with the absence of  
125 mutagenic effect in exponentially growing bacteria. If the organism is diploid (even if the diploidy  
126 is only transient, as in replicating bacteria or replicating haploid yeast), then homology-directed  
127 repair can be used [20]. Because *E. coli* lacks a pathway to join non-homologous ends, homologous  
128 recombination is the only mechanism to salvage broken chromosomes [22]. But how can *E. coli*  
129 repair DSBs in stationary phase by homologous recombination? Stationary-phase cultures contain  
130 cells with several chromosome copies [23]. In exponentially growing *E. coli* DSB repair is non-  
131 mutagenic [24,25]. However, break repair becomes mutagenic during the stationary phase and  
132 requires the Sigma S factor (RpoS), the SOS response, and the error-prone DNA polymerase PolIV.  
133 The change from one situation to the other has been described as a switch from high-fidelity repair  
134 in the exponential phase to error-prone DNA double-strand breaks during the stationary phase  
135 [24,25]. Because DSBs are lethal unless repaired, and repair action requires RecA protein [24,25],

136 the experiment of sepiolite mutagenesis was repeated with *E. coli* DH5 $\alpha$  that is impaired in the SOS  
137 response triggering to confirm this notion. In such analysis, sepiolite mutagenesis was completely  
138 abolished by *recA* gene inactivation in stationary phase (Kruskal-Wallis test; P=0.011; fig 4). Thus,  
139 the lower level of mutant frequency in the *recA* deficient strain could be explained by the death of  
140 cells that suffered DSBs and were unable to repair them. Mutations introduced by DSB repair are  
141 considered a mechanism of diversity via mutagenic repair in bacteria [26,27].

142

143 Potentially, the mutagenicity of clay treatment is also enhanced in stationary phase cells due to  
144 DNA being more tightly compacted than in the exponential phase [28]. Indeed, in *Escherichia coli*,  
145 DNA goes to a co-crystallization state with the stress-induced protein Dps offering protection to  
146 several types of stress, ordinarily chemical damage [29]. However, while crystallization is often  
147 associated with less flexibility or added fragility to direct physical contact, less compacted DNA of  
148 proliferating *E. coli* is elastic and soft [30], which may limit the number of DSBs. It is then possible  
149 that mineral fibres under friction can break DNA strands more easily in the stationary than in the  
150 exponential phase.

151

152 **Sepiolite fibres can penetrate bacteria when friction forces are present.** To reunite more  
153 evidence that penetration and interaction of fibres with DNA cause DSBs inside the cell, a direct  
154 observation of sepiolite-treated bacteria by scanning electron microscopy (SEM) was performed.  
155 Fibres look compatible in dimensions able to penetrate bacteria without completely destroying the  
156 envelope. Additionally, bacteria were directly penetrated by fibres while those that were exposed to  
157 mineral without friction were not (fig 5). This observation is in concordance with previous studies,  
158 whereas sepiolite and other nano-sized acicular materials can penetrate bacterial cells under friction  
159 forces on a hydrogel [6]. In fact, the partial destruction of the cell wall and the presence of mutants  
160 after adding 2-2' bipyridyl point to the mechanical action as causing agent of the damage. The  
161 notion of mechanical breaks is in good agreement with the results in cell-free systems. In these  
162 experiments, breakage of plasmid DNA was not directly associated with the amount of iron released  
163 by asbestos fibres when they are incubated together [14].

164

165 **Sepiolite fibre length matters to cause significant DNA damage in the cell.** Sepiolite also  
166 contains very short fibres (fig S2). In the case of asbestos, there is a certainty that long fibres are  
167 much more dangerous by their carcinogenic potential. We designed an experiment to test the  
168 influence sepiolite fibre length for mutagenesis in bacteria. The exposure of stationary phase  
169 bacteria to a suspension of short fibres (less than 1  $\mu\text{m}$ ) did not cause any significant DNA damage

170 when compared with the control and in contrast with the long-fibre original mineral suspension  
171 (Kruskal-Wallis test;  $P=0.005$ ; fig 6).

172

173 **Asbestos fibres increase the mutant frequency in the same way as sepiolite do.** Bacterial  
174 genotoxicity experiments are considered a key step in the assessment of mutagenic properties of  
175 chemicals, drugs or materials in general [31]. Because asbestos fibres resemble sepiolite ones, an  
176 experiment to test if asbestos fibres provoke an increase in mutagenesis was designed using  
177 crocidolite asbestos (fig S2). In our assay, the addition of asbestos to bacteria in the plates without  
178 friction did not increase the mutant frequency. In contrast, the application of friction when the fibres  
179 were present increased the mutant frequency even more than sepiolite alone (Kruskal-Wallis test;  
180  $P=0.002$ ; fig 7), probably by the same mode of action. Yoshida *et al.* have suggested that asbestos  
181 and other clays can be potentially mutagenic based on integrity analysis of genomic DNA from  
182 treated bacteria [32]. A clear antecedent of the ability of fibrous nanoclays to penetrate bacteria was  
183 the transformation of monkey cells in culture by exogenous plasmid DNA using chrysotile (a type  
184 of asbestos) [10]. Although procedures are not described in details, we think that this transformation  
185 requires penetration of the cell membrane.

186

187 **Further discussion.** The poor correlation between DNA damage *in vivo* and *in vitro* described in  
188 previous studies [12] may be explained by the limited or lack of penetration of asbestos in  
189 experimental designs. Thus, the introduction of some friction or shaking can in determining if  
190 penetration of cells by asbestos and other fibres underly a molecular mechanism of carcinogenesis.  
191 The mechanism(s) underlying asbestos toxicity associated with the pathogenesis of mesothelioma  
192 has been a challenge to unravel for more than six decades [33]. According to our results and the  
193 current knowledge about asbestos-induced carcinomas, we speculate about a model that explains a  
194 potential path leading to carcinomas. Briefly, we think that people exposed to asbestos fibres during  
195 prolonged periods accumulate them in the respiratory tract. It is frequent to find asbestos fibres into  
196 the pleural cavity, and maybe they increase the friction coefficient in the pleural space, a parameter  
197 with a very small value in in physiological conditions [34]. The coelomic movement (a cyclical  
198 mechanical movement between the parietal pleura—covering membrane of the inner surface of the  
199 thoracic cavity—and the visceral pleura—covering membrane of the lung surface—) provokes the  
200 movement of asbestos, trespassing occasionally the mesothelial cell membranes or floating  
201 mesothelial cells, physically interacting and disrupting the DNA or spindle. This physical  
202 interaction, with adequate intensity, could induce DSBs, which generate chromosome aberrations or  
203 fragmentations in eukaryotic cells as we found here for bacteria. After years of exposure, DSBs or

204 spindle disruption can cause chromosome damages or losses or aneuploidy that increase the  
205 probability of malignancy. The proposed model for eukaryote cells would need *in vitro* validation  
206 with epithelial cells but this is beyond the scope of the current study and left for future research.  
207 Moreover, this model does not exclude other toxic and genotoxic mechanisms of asbestosis such as  
208 reactive species arising from metal action or inflammatory response.

209

210 One of the most important limitations of our study is the lack of an animal model to test if our  
211 finding of mutagenicity in bacteria by clays occurs *in vivo*. In theory, clays present in livestock feed  
212 could promote antibiotic resistance and virulence in pathogenic bacteria by not only their  
213 transformation ability but also via mutations. However, testing conditions are hindered by the fact  
214 that experiments would require at least S1 security level, and this is difficult to achieve with  
215 livestock animals [4]. Transformation of plasmid DNA requires penetration and sepiolite and other  
216 clays have shown this capacity in a wide range of concentrations although it diminishes at high  
217 concentration due to the killing of bacteria [9,35–37]. In a previous study, the values of pressure in  
218 the gut of many animal species were discussed, meeting the criteria very well [4]. The presence of a  
219 hydrogel does not seem to be a problem since both mucin layer of the gut or mucoid secretion in the  
220 respiratory tract can play that role, particularly if fibres have the capacity to change viscosity locally  
221 or gradients of viscosity exist across these body compartments.

222

223 An implication of our study is the consideration of other factors (such the friction forces) in  
224 assessing of genotoxicity and carcinogenesis by certain fibrous materials. Until now, many studies  
225 associate clay-induced damage mostly with ROS [14]. DNA damage can be produced by oxido-  
226 reduction processes generated by metal containing-fibres. Asbestos fibres are carcinogenic for both,  
227 humans and experimental animals, because asbestos produce DNA breaks leading to the formation  
228 of micronucleus (a type of chromosomal aberration) [38]. This kind of damage seems to be caused  
229 more by mechanical action rather than ROS generation, which can worsen the situation but not  
230 necessarily has to be determinant. In other words, we think that ROS is more a symptom than a  
231 cause. Another example of a potentially dangerous material are the carbon nanotubes (CNTs), a  
232 novel industrial material with many applications. The genetic alterations provoked by these  
233 nanotubes in rat malignant mesothelioma were similar to those induced by asbestos [39].  
234 Interestingly, CNTs lack heavy metals in their composition. The nanoscale size and needle-like  
235 rigid structure of CNTs appear to be associated with their pathogenicity in mammalian cells [38].  
236 Coincidentally, CNTs can be used to transform bacteria with plasmids [40] in a similar fashion that

237 asbestos [10,41] and sepiolite do [6,42]. It would not be surprising that all these fibrous  
238 nanomaterials share their ability to mechanically induce DSBs.

239 Recently, a possible link between talcum powder and ovarian cancer risk associated with asbestos  
240 contamination in talc is under discussion. Although the risk is small, some studies suggested a low  
241 or moderate but significant chance of cancer, while other rejected/discarded this correlation [43–  
242 45]. It is necessary to advance the understanding of molecular base of DNA damage by asbestos  
243 and other industrial fibres. If the proposed model of mechanical/physical DNA breaks is validated  
244 in future studies, some genotoxicity assays intended to unveil mutagenic properties of materials  
245 (e.g. the test of Ames) should be modified accordingly to include a standardised procedure of  
246 friction or promoting some sort of shaking during incubation steps. Similarly, several *in vitro* test,  
247 with both bacteria and eukaryotic cells, were modified by researchers and regulatory agencies  
248 where introduced the metabolic activation by fraction S9 of liver homogenate [46].

249  
250 Other implications of the induction of DSBs by nanofibres in bacteria could be related with the  
251 microbiota of animals that use gastroliths. It has been suggested that gut microbes play a crucial  
252 role in keeping species apart or enhance the speciation [47]. It is tempting to speculate that animals  
253 that use gastroliths or sediment ingestion expose their microbiota to the abrasive action of stone  
254 derivative fibres. Therefore, the shaping of their own microbes is expected to contribute to their  
255 own speciation trajectories. Among animals that use or used gastroliths in their evolutionary  
256 trajectories, we find several branches of fishes, amphibians, reptiles (including dinosaurs) and birds.  
257 Gastroliths also regularly occur in several groups of invertebrates [48]. Wings (2007) recommends  
258 making a distinction between lithophagy and geophagy. Lithophagy (stones larger than 0.063 mm  
259 in diameter) is defined as the deliberate consumption of stones that turn into gastroliths after their  
260 ingestion. Geophagy is the consumption of soil and it is known for reptiles, birds, and mammals.  
261 These soils, rich in clays, salts or fat, serve mainly as a food supplement for the supply of specific  
262 minerals or for medical purposes [48]. Both concepts can contribute to getting together all the  
263 components that this mechanism needs to operate: gut microbiota, gut mucin mucoid layer  
264 (hydrogel) and friction forces provided by the peristaltic pressure of digestive tract in animals,  
265 especially the gizzard and the stomach. An interesting question is why sepiolite from limestone  
266 gastroliths does not damage the animal gut. A convincing explanation is that the mucoid layer in the  
267 gut protects it from the action of these sharp fibres at the time that serve as a protective layer for gut  
268 epithelium. In mammals, this mucoid layer is around 200  $\mu\text{m}$  thick and is under continuous  
269 renovation [49]. Sepiolite is a natural clay mineral characterised by a nanofibre structure with



270 average dimensions less than or equal to 0.2 micrometers in diameter, and from 2 to 5 micrometers  
271 in length, although longer fibres can be present.

272

273 **Concluding remarks.** Overall, one of the most significant contributions of this article is the  
274 proposition for the first time of a bacterial model to test genotoxicity of nanofibres and uncover a  
275 new mechanism of action for asbestos that correlates better with *in vivo* observations. Asbestosis is  
276 a global health and environmental problem, which molecular basis has been a challenge for several  
277 decades [33]. Although asbestos fibres are widely distributed in the anatomy of patients [33,50], the  
278 most common cancers caused by asbestos originate in lungs (mostly mesothelioma). If the most  
279 explored mechanism of action is based on reactive radicals (chemical damage), why is not there  
280 significant differences in the frequencies of other types of carcinoma such as leukaemia, lymphoma,  
281 liver or kidney cancer among exposed populations? In the last place, and not less important, is the  
282 tighter contact of slippery membranes (a monolayer of flattened epithelial-like cells) of the  
283 mesothelium. The pleural space is in continuous movement and constitute preferential target of  
284 asbestos-induced carcinogenesis. Of particular interest are free-floating mesothelial cells of the  
285 cavity, that even proliferate under damaging conditions [51]. The free-floating cells are the ideal  
286 candidates to be penetrated by asbestos in the pleural space. They may be more sensitive to suffer  
287 direct (physical) or indirect (chemical) DNA damage and become into a mesothelioma. Finally,  
288 sepiolite transformation technique gained some popularity in the last years because there is no need  
289 to prepare competence cells [9,19,42,52]. In that case, diverse bacteria can be transformed [4] in  
290 both stationary and exponentially growing phases. However, to prevent undesired mutations in  
291 both, plasmid and genomic DNA, it is highly recommendable to use exponential phase bacteria,  
292 where mutagenesis is not significant, at least in *E. coli*.

293

## 294 **Methods**

295

296 **Bacteria and growth conditions.** The *E. coli* MG1655 wild-type strain and its derivative mutants  
297 were cultured in Lysogenic Broth (LB). All experiments were performed at 37°C, with shaking in  
298 liquid culture. All solid cultures were grown in LB agar 1.5% for standard procedures and 2% for  
299 the sepiolite treatment. All cultures were supplemented with antibiotics when appropriate.

300

301 **Mutant frequency estimation of sepiolite treated cells.** Approximately  $2 \times 10^9$  bacterial cells per  
302 ml of *E. coli* MG1655 and its derivative mutants from overnight or mid-exponential growing  
303 cultures were centrifuged and resuspended in 100  $\mu$ l of sterilised transformation mixture, consisting

304 of sepiolite (Kremer Pigmente, Germany) suspended in aqueous solution at a final concentration of  
305 0.1 mg/ml. Resuspended cells were spread on plates containing fresh Müller-Hinton-Agar (Sigma-  
306 Aldrich, Germany) medium solidified with 2% agar, and Petri dishes were pre-dried in a biological  
307 safety flow cabinet for 20 minutes before use. Friction force was provided by streaking bacterial  
308 cultures plus sepiolite with sterile glass stir sticks gently pressed onto the medium surface for one,  
309 two and three minutes, applying as much pressure as possible without breaking the agar gel. Petri  
310 dishes were incubated at 37°C for 2 hours to allow DNA repair if any damage occurred. The plates  
311 were gently washed four times with 5 ml of 0.9% sodium chloride solution using a 5 ml pipette. The  
312 bacterial suspensions were transferred to 10 ml tubes to recover the cells by centrifugation at 3000 g  
313 for 10 minutes. The resulting pellets were resuspended in a final volume of 1 ml of fresh LB and  
314 incubated during 1 hour at 37°C to allow the cells to recover. Appropriate dilutions were plated onto  
315 LB plates to estimate bacterial viability and in LB plus fosfomycin (50 µg/ml) to estimate the  
316 number of resistant mutants. Plates were incubated overnight at 37°C. Each experiment consisted of  
317 5 replicates and was repeated at twice. Mutant frequencies were calculated by using the FALCOR  
318 web-tool [53].

319

320 **Influence of 2-2' bipyridyl on sepiolite mutagenesis.** The effect of 2-2' bipyridyl, a metal  
321 chelating agent [54], on sepiolite mutagenesis was determined by measuring its influence on the  
322 mutant frequency for a selected concentration of sepiolite, where mutagenesis was observed. The  
323 experiment consisted of adding a titrating concentration of 2-2' bipyridyl (200 µM) to chelate  
324 metals five minutes before the treatment. Cultures treated with sepiolite and friction without the  
325 addition of 2-2' bipyridyl and bacteria alone without sepiolite were used as a control. The mutant  
326 frequencies for these groups were determined as described elsewhere in this section.

327

328 **Assessing double-strand breaks with a plasmid system.** To evaluate if sepiolite under friction  
329 treatment induces double-strand breaks in plasmid DNA, the strain *Escherichia coli* DH5α (fhuA2  
330 lac(del)U169 phoA glnV44 Φ80' lacZ(del)M15 gyrA96 recA1 relA1 endA1 thi-1 hsdR17) carrying  
331 the plasmid pET-19b (Novagen, Germany) was treated with sepiolite and sliding friction forces  
332 during one minute. Several samples were recovered from the plates and pooled to compensate  
333 viability losses due to friction. The recovery was done by washing the surface with 5 ml 0.9 % NaCl  
334 saline solution four times as described for mutagenesis experiments. The recovered pellets were  
335 washed with 1 ml of TE buffer and the OD<sub>600</sub> adjusted to 1 for each type of sample. Plasmid DNA  
336 samples were extracted using a Qiagen mini plasmid extraction kit (Qiagen, Germany). Added  
337 sepiolite with or without friction and no sepiolite groups were used as a control group. Each

338 experiment consisted of five replicates. The same amount of plasmid DNA per replicate was  
339 applied per well to an agarose gel that was stained with SYBR® Gold Nucleic Acid Gel Stain kit  
340 (Molecular Probes, USA). A NdeI (Promega, USA) digested aliquot of pET-19b was used as  
341 control of linear migration rate. The proportion of linear molecules of the plasmid were compared  
342 among groups using a densitometry analysis by ImageJ [55].

343

344 **RecA deficient strain construction.** The *recA* null mutant was constructed following a previously  
345 described methodology [56] with the primers 5'-CAGAACATATTGACTATCCGGTATTACCCG-  
346 GCATGACAGGAGTAAAAATGGT-GTAGGCTGGAGCTGCTTC-3' and 5'-  
347 ATGCGACCCTTGTGTATCAAACAAGACGATTAATAATCTTCGTTAGTTTCATGGGAAT-  
348 TAGCCATGGTCC-3' (forward and reverse respectively) using the pKD3 plasmid as template.  
349 The mutant was checked by PCR amplification using the primers c1 5'-  
350 TTATACGCAAGGCGACAAGG-3' and c2 5'-GATCTTCCGTCACAGGTAGG-3' in  
351 combination with specific primers for upstream and downstream regions of *recA* gene: 5'-  
352 ATTGCAGACCTTGTGGCAAC-3' and 5'-CGATCCAACAGGCGAGCATAT-3' respectively.  
353 Additionally, the increased susceptibility to UV light and mitomycin C was tested phenotypically in  
354 comparison to the parental strain. The antibiotic resistance gene was eliminated using the pCP20  
355 plasmid as described previously [56].

356

357 **SEM of *E. coli* treated with sepiolite.** Approximately  $2 \times 10^9$  CFU of stationary phase *E. coli*  
358 MG1655 were treated with sepiolite and friction force was applied for one minute as described for  
359 the mutagenesis experiment. Circular agar blocks were taken from agar plates with a sterile cork  
360 borer (1 cm of diameter). Then, a thin surface layer was cut off, placed on a circular glass cover slip  
361 (1.5 cm of diameter) and incubated for 45 minutes at room temperature in a laminar flow cabinet to  
362 allow air drying of the samples. The cover glasses with dehydrated agar sections were mounted on  
363 aluminium stubs using double-sided adhesive tape and coated with gold in a sputter coater (SCD-  
364 040; Balzers, Union, Liechtenstein). The specimens were examined with a FEI Quanta 200 SEM  
365 (FEI Co., Hillsboro, OR) operating at an accelerating voltage of 15 kV under high vacuum mode at  
366 different magnifications. At least 5 sections from independent plates were observed to check  
367 physical penetration by the mineral. Some samples of sepiolite or asbestos (crocidotiles) alone were  
368 processed and observed in the same way.

369 **Long fibre-depleted sepiolite mutagenesis experiment.** To assess the role of long fibre of  
370 sepiolite in mutagenesis, a sepiolite preparation depleted of fibres longer than 1  $\mu\text{m}$  was obtained. A  
371 100 ml sepiolite suspension (1 mg/ml) in distilled water was passed through Pall® Acrodisc® glass

372 fibre syringe filters (Sigma, USA) several times. The resulting suspension was desiccated by  
373 evaporation at 70°C overnight. A non-filtered solution was used as a control. From the obtained  
374 powder, two suspensions were prepared to a final proportion of 0.1 mg/ml. These two solutions  
375 were used for a mutagenesis experiment plating in fosfomycin as indicated previously, using a  
376 friction time of two minutes.

377

378 **Mutant frequency estimation of asbestos treated cells.** The procedure was carried out identically  
379 that the one described for sepiolite in this section. The time was set to two minutes and the same  
380 concentration that was used, 0.1 mg/ml. We used the crocidolite asbestos analytical standard (SPI  
381 Supplies, USA). The asbestos fibres were resuspended in distilled water, autoclaved and sonicated  
382 in bath during 10 minutes before use to render a homogeneous suspension.

383

384 **Statistical analysis.** To compare experimental groups, Kruskal-Wallis test or One-way ANOVA  
385 test were performed. In case of significance, Bonferroni-corrected one-tailed Mann-Whitney U test  
386 or Tukey HSD Test were used respectively. P values less than or equal to 0.05, after correction if  
387 needed, were considered statistically significant. All tests were performed with the statistic software  
388 R v. 3.4.2 [57].

389

### 390 **Acknowledgements**

391

392 ARR was supported by The Collaborative Research Centre (CRC) via project 973 “Priming and  
393 Memory of Organismic Responses to Stress”, project C5. J.B. was supported by Plan Nacional de  
394 I+D+i and Instituto de Salud Carlos III, Subdirección General de Redes y Centros de Investigación  
395 Cooperativa, Ministerio de Economía y Competitividad, Spanish Network for Research in  
396 Infectious Diseases (REIPI RD15/0012)-co-financed by European Development Regional Fund "A  
397 way to achieve Europe" ERDF and Fondo de Investigación Sanitaria Grant PI13/00063. We are  
398 grateful to Alejandro Couce, Olga Makarova and Jens Rolff for critical comments about the  
399 manuscript.

400

401

402

403

404

## 405 **References**

406

- 407 1. Ouhida I, Pérez JF, Piedrafita J, Gasa J (2000) The effects of sepiolite in broiler chicken diets  
408 of high, medium and low viscosity. Productive performance and nutritive value. *Anim Feed*  
409 *Sci Technol* 85: 183–194.
- 410 2. Parisini P, Martelli G, Sardi L, Escribano F (1999) Protein and energy retention in pigs fed  
411 diets containing sepiolite. *Anim Feed Sci Technol* 79: 155–162. Available:  
412 <http://www.animalfeedscience.com/article/S0377840199000085/fulltext>. Accessed 18 June  
413 2013.
- 414 3. Viseras C, Lopez-Galindo A (1999) Pharmaceutical applications of some spanish clays  
415 (sepiolite, palygorskite, bentonite): some preformulation studies. *Appl Clay Sci* 14: 69–82.  
416 Available: [http://dx.doi.org/10.1016/S0169-1317\(98\)00050-7](http://dx.doi.org/10.1016/S0169-1317(98)00050-7). Accessed 18 June 2013.
- 417 4. Rodríguez-Rojas A, Rodríguez-Beltrán J, Valverde JR, Blázquez J (2015) Can Clays in  
418 Livestock Feed Promote Antibiotic Resistance and Virulence in Pathogenic Bacteria?  
419 *Antibiotics* 4: 299–308. Available: <http://www.mdpi.com/2079-6382/4/3/299>. Accessed 16  
420 July 2015.
- 421 5. Rodríguez-Beltrán J, Rodríguez-Rojas A, Yubero E, Blázquez J (2013) The Animal Food  
422 Supplement Sepiolite Promotes a Direct Horizontal Transfer of Antibiotic Resistance  
423 Plasmids between Bacterial Species. *Antimicrob Agents Chemother* 57: 2651–2653.  
424 Available: [http://www.pubmedcentral.nih.gov/articlerender.fcgi?](http://www.pubmedcentral.nih.gov/articlerender.fcgi?artid=3716135&tool=pmcentrez&rendertype=abstract)  
425 [artid=3716135&tool=pmcentrez&rendertype=abstract](http://www.pubmedcentral.nih.gov/articlerender.fcgi?artid=3716135&tool=pmcentrez&rendertype=abstract). Accessed 18 June 2013.
- 426 6. Yoshida N, Sato M (2009) Plasmid uptake by bacteria: a comparison of methods and  
427 efficiencies. *Appl Microbiol Biotechnol* 83: 791–798. Available:  
428 [http://www.ncbi.nlm.nih.gov/entrez/query.fcgi?](http://www.ncbi.nlm.nih.gov/entrez/query.fcgi?cmd=Retrieve&db=PubMed&dopt=Citation&list_uids=19471921)  
429 [cmd=Retrieve&db=PubMed&dopt=Citation&list\\_uids=19471921](http://www.ncbi.nlm.nih.gov/entrez/query.fcgi?cmd=Retrieve&db=PubMed&dopt=Citation&list_uids=19471921).
- 430 7. Dong L, Johnson DT (2005) Adsorption of acicular particles at liquid-fluid interfaces and the  
431 influence of the line tension. *Langmuir* 21: 3838–3849. Available:  
432 [http://www.ncbi.nlm.nih.gov/entrez/query.fcgi?](http://www.ncbi.nlm.nih.gov/entrez/query.fcgi?cmd=Retrieve&db=PubMed&dopt=Citation&list_uids=15835945)  
433 [cmd=Retrieve&db=PubMed&dopt=Citation&list\\_uids=15835945](http://www.ncbi.nlm.nih.gov/entrez/query.fcgi?cmd=Retrieve&db=PubMed&dopt=Citation&list_uids=15835945). Accessed 18 June 2013.
- 434 8. Djordjevic SP, Stokes HW, Roy Chowdhury P (2013) Mobile elements, zoonotic pathogens  
435 and commensal bacteria: conduits for the delivery of resistance genes into humans,  
436 production animals and soil microbiota. *Front Microbiol* 4: 86. Available:  
437 [http://www.pubmedcentral.nih.gov/articlerender.fcgi?](http://www.pubmedcentral.nih.gov/articlerender.fcgi?artid=3639385&tool=pmcentrez&rendertype=abstract)  
438 [artid=3639385&tool=pmcentrez&rendertype=abstract](http://www.pubmedcentral.nih.gov/articlerender.fcgi?artid=3639385&tool=pmcentrez&rendertype=abstract). Accessed 10 June 2013.
- 439 9. Wilharm G, Lepka D, Faber F, Hofmann J, Kerrinnes T, et al. (2010) A simple and rapid  
440 method of bacterial transformation. *J Microbiol Methods* 80: 215–216. Available:  
441 <http://dx.doi.org/10.1016/j.mimet.2009.12.002>. Accessed 18 June 2013.

- 442 10. Appel JD, Fasy TM, Kohtz DS, Kohtz JD, Johnson EM (1988) Asbestos fibers mediate  
443 transformation of monkey cells by exogenous plasmid DNA. *Proc Natl Acad Sci U S A* 85:  
444 7670–7674. Available: [http://www.pubmedcentral.nih.gov/articlerender.fcgi?](http://www.pubmedcentral.nih.gov/articlerender.fcgi?artid=282254&tool=pmcentrez&rendertype=abstract)  
445 [artid=282254&tool=pmcentrez&rendertype=abstract](http://www.pubmedcentral.nih.gov/articlerender.fcgi?artid=282254&tool=pmcentrez&rendertype=abstract). Accessed 1 July 2013.
- 446 11. Huang SXL, Jaurand M-C, Kamp DW, Whysner J, Hei TK (2011) Role of mutagenicity in  
447 asbestos fiber-induced carcinogenicity and other diseases. *J Toxicol Environ Health B Crit*  
448 *Rev* 14: 179–245. Available: [http://www.pubmedcentral.nih.gov/articlerender.fcgi?](http://www.pubmedcentral.nih.gov/articlerender.fcgi?artid=3118525&tool=pmcentrez&rendertype=abstract)  
449 [artid=3118525&tool=pmcentrez&rendertype=abstract](http://www.pubmedcentral.nih.gov/articlerender.fcgi?artid=3118525&tool=pmcentrez&rendertype=abstract). Accessed 6 April 2016.
- 450 12. Daniel FB (1983) In vitro assessment of asbestos genotoxicity. *Environ Health Perspect* 53:  
451 163–167. Available: <http://www.ncbi.nlm.nih.gov/pubmed/6363052>. Accessed 2 November  
452 2016.
- 453 13. Fowler P, Homan A, Atkins D, Whitwell J, Lloyd M, et al. (2016) The utility of the in vitro  
454 micronucleus test for evaluating the genotoxicity of natural and manmade nano-scale fibres.  
455 *Mutat Res Toxicol Environ Mutagen* 809: 33–42. Available:  
456 <http://www.ncbi.nlm.nih.gov/pubmed/27692297>. Accessed 6 January 2017.
- 457 14. Jaurand MC (1997) Mechanisms of fiber-induced genotoxicity. *Environ Health Perspect* 105  
458 *Suppl*: 1073–1084. Available: [http://www.pubmedcentral.nih.gov/articlerender.fcgi?](http://www.pubmedcentral.nih.gov/articlerender.fcgi?artid=1470173&tool=pmcentrez&rendertype=abstract)  
459 [artid=1470173&tool=pmcentrez&rendertype=abstract](http://www.pubmedcentral.nih.gov/articlerender.fcgi?artid=1470173&tool=pmcentrez&rendertype=abstract). Accessed 15 April 2016.
- 460 15. Berendonk TU, Manaia CM, Merlin C, Fatta-Kassinos D, Cytryn E, et al. (2015) Tackling  
461 antibiotic resistance: the environmental framework. *Nat Rev Microbiol* 13: 310–317.  
462 Available: <http://dx.doi.org/10.1038/nrmicro3439>. Accessed 22 November 2015.
- 463 16. Blázquez J, Couce A, Rodríguez-Beltrán J, Rodríguez-Rojas A, Blázquez J, et al. (2012)  
464 Antimicrobials as promoters of genetic variation. *Curr Opin Microbiol* 15: 561–569.  
465 Available: <http://www.ncbi.nlm.nih.gov/pubmed/22890188>. Accessed 24 May 2013.
- 466 17. Zipperer A, Konnerth MC, Laux C, Berscheid A, Janek D, et al. (2016) Human commensals  
467 producing a novel antibiotic impair pathogen colonization. *Nature* 535: 511–516. Available:  
468 <http://www.nature.com/doi/10.1038/nature18634>. Accessed 6 January 2017.
- 469 18. Williams LB, Metge DW, Eberl DD, Harvey RW, Turner AG, et al. (2011) What makes a  
470 natural clay antibacterial? *Environ Sci Technol* 45: 3768–3773. Available:  
471 [/pmc/articles/PMC3126108/?report=abstract](http://pmc/articles/PMC3126108/?report=abstract). Accessed 26 June 2015.
- 472 19. Yoshida N, Ide K (2008) Plasmid DNA is released from nanosized acicular material surface  
473 by low molecular weight oligonucleotides: exogenous plasmid acquisition mechanism for  
474 penetration intermediates based on the Yoshida effect. *Appl Microbiol Biotechnol* 80: 813–  
475 821. Available: <http://www.ncbi.nlm.nih.gov/pubmed/18704395>. Accessed 18 June 2013.
- 476 20. Lieber MR (2010) The mechanism of double-strand DNA break repair by the  
477 nonhomologous DNA end-joining pathway. *Annu Rev Biochem* 79: 181–211. Available:  
478 <http://www.ncbi.nlm.nih.gov/pubmed/20192759>. Accessed 11 July 2014.

- 479 21. Sambrook J, Russell DW (2001) *Molecular cloning: a laboratory manual*. 3rd ed. Cold  
480 Spring Harbor [New York]: Laboratory Press.
- 481 22. Persky NS, Lovett ST (2008) Mechanisms of Recombination: Lessons from *E. coli*. *Crit Rev*  
482 *Biochem Mol Biol* 43: 347–370. doi:10.1080/10409230802485358.
- 483 23. Akerlund T, Nordström K, Bernander R (1995) Analysis of cell size and DNA content in  
484 exponentially growing and stationary-phase batch cultures of *Escherichia coli*. *J Bacteriol*  
485 177: 6791–6797. Available: <http://www.ncbi.nlm.nih.gov/pubmed/7592469>. Accessed 6  
486 January 2017.
- 487 24. Ponder RG, Fonville NC, Rosenberg SM (2005) A switch from high-fidelity to error-prone  
488 DNA double-strand break repair underlies stress-induced mutation. *Mol Cell* 19: 791–804.  
489 Available: <http://www.ncbi.nlm.nih.gov/pubmed/16168374>. Accessed 3 April 2016.
- 490 25. Shee C, Gibson JL, Darrow MC, Gonzalez C, Rosenberg SM (2011) Impact of a stress-  
491 inducible switch to mutagenic repair of DNA breaks on mutation in *Escherichia coli*. *Proc*  
492 *Natl Acad Sci U S A* 108: 13659–13664. Available:  
493 <http://www.ncbi.nlm.nih.gov/pubmed/21808005>. Accessed 14 November 2016.
- 494 26. Boles BR, Thoendel M, Singh PK (2004) Self-generated diversity produces “insurance  
495 effects” in biofilm communities. *Proc Natl Acad Sci U S A* 101: 16630–16635. Available:  
496 [http://www.ncbi.nlm.nih.gov/entrez/query.fcgi?](http://www.ncbi.nlm.nih.gov/entrez/query.fcgi?cmd=Retrieve&db=PubMed&dopt=Citation&list_uids=15546998)  
497 [cmd=Retrieve&db=PubMed&dopt=Citation&list\\_uids=15546998](http://www.ncbi.nlm.nih.gov/entrez/query.fcgi?cmd=Retrieve&db=PubMed&dopt=Citation&list_uids=15546998).
- 498 27. Rosenberg SM, Shee C, Frisch RL, Hastings PJ (2012) Stress-induced mutation via DNA  
499 breaks in *Escherichia coli*: a molecular mechanism with implications for evolution and  
500 medicine. *Bioessays* 34: 885–892. Available:  
501 <http://www.ncbi.nlm.nih.gov/pubmed/22911060>. Accessed 6 January 2017.
- 502 28. Dorman CJ (2013) Genome architecture and global gene regulation in bacteria: making  
503 progress towards a unified model? *Nat Rev Microbiol* 11: 349–355. Available:  
504 <http://dx.doi.org/10.1038/nrmicro3007>. Accessed 6 April 2016.
- 505 29. Wolf SG, Frenkiel D, Arad T, Finkel SE, Kolter R, et al. (1999) DNA protection by stress-  
506 induced biocrystallization. *Nature* 400: 83–85. Available:  
507 <http://www.ncbi.nlm.nih.gov/pubmed/10403254>. Accessed 12 April 2016.
- 508 30. Pelletier J, Halvorsen K, Ha B-Y, Paparcone R, Sandler SJ, et al. (2012) Physical  
509 manipulation of the *Escherichia coli* chromosome reveals its soft nature. *Proc Natl Acad Sci*  
510 *U S A* 109: E2649-56. Available: <http://www.ncbi.nlm.nih.gov/pubmed/22984156>. Accessed  
511 5 January 2017.
- 512 31. Eastmond DA, Hartwig A, Anderson D, Anwar WA, Cimino MC, et al. (2009) Mutagenicity  
513 testing for chemical risk assessment: update of the WHO/IPCS Harmonized Scheme.  
514 *Mutagenesis* 24: 341–349. Available: <http://www.ncbi.nlm.nih.gov/pubmed/19535363>.  
515 Accessed 28 October 2016.

- 516 32. Yoshida N, Naka T, Ohta K (2004) Mutagenesis of bacteria by fibrous or clay minerals. *J*  
517 *Biol Sci* 4: 532–526. Available: <http://www.scialert.net/abstract/?doi=jbs.2004.532.536>.  
518 Accessed 15 November 2016.
- 519 33. Barlow CA, Lievens L, Gross S, Ronk CJ, Paustenbach DJ (2013) The role of genotoxicity  
520 in asbestos-induced mesothelioma: an explanation for the differences in carcinogenic  
521 potential among fiber types. *Inhal Toxicol* 25: 553–567. Available:  
522 <http://www.ncbi.nlm.nih.gov/pubmed/23905972>. Accessed 15 April 2016.
- 523 34. Misericocchi G, Sancini G, Mantegazza F, Chiappino G (2008) Translocation pathways for  
524 inhaled asbestos fibers. *Environ Health* 7: 4. Available:  
525 <http://www.ncbi.nlm.nih.gov/pubmed/18218073>. Accessed 2 November 2016.
- 526 35. Rodriguez-Beltran J, Elabed H, Gaddour K, Blazquez J, Rodriguez-Rojas A (2012) Simple  
527 DNA transformation in *Pseudomonas* based on the Yoshida effect. *J Microbiol Methods* 89:  
528 95–98. Available: [http://www.ncbi.nlm.nih.gov/entrez/query.fcgi?](http://www.ncbi.nlm.nih.gov/entrez/query.fcgi?cmd=Retrieve&db=PubMed&dopt=Citation&list_uids=22405834)  
529 [cmd=Retrieve&db=PubMed&dopt=Citation&list\\_uids=22405834](http://www.ncbi.nlm.nih.gov/entrez/query.fcgi?cmd=Retrieve&db=PubMed&dopt=Citation&list_uids=22405834).
- 530 36. Tan H, Fu L, Seno M (2010) Optimization of bacterial plasmid transformation using  
531 nanomaterials based on the yoshida effect. *Int J Mol Sci* 11: 4961–4972. Available:  
532 [http://www.pubmedcentral.nih.gov/articlerender.fcgi?](http://www.pubmedcentral.nih.gov/articlerender.fcgi?artid=3100829&tool=pmcentrez&rendertype=abstract)  
533 [artid=3100829&tool=pmcentrez&rendertype=abstract](http://www.pubmedcentral.nih.gov/articlerender.fcgi?artid=3100829&tool=pmcentrez&rendertype=abstract). Accessed 1 July 2013.
- 534 37. Mitsudome Y, Takahama M, Hirose J, Yoshida N (2014) The use of nano-sized acicular  
535 material, sliding friction, and antisense DNA oligonucleotides to silence bacterial genes.  
536 *AMB Express* 4: 70. Available: [http://www.pubmedcentral.nih.gov/articlerender.fcgi?](http://www.pubmedcentral.nih.gov/articlerender.fcgi?artid=4230895&tool=pmcentrez&rendertype=abstract)  
537 [artid=4230895&tool=pmcentrez&rendertype=abstract](http://www.pubmedcentral.nih.gov/articlerender.fcgi?artid=4230895&tool=pmcentrez&rendertype=abstract). Accessed 6 April 2016.
- 538 38. Toyokuni S (2013) Genotoxicity and carcinogenicity risk of carbon nanotubes. *Adv Drug*  
539 *Deliv Rev* 65: 2098–2110. Available: <http://www.ncbi.nlm.nih.gov/pubmed/23751780>.  
540 Accessed 15 April 2016.
- 541 39. Chernova T, Murphy FA, Galavotti S, Sun X-M, Powley IR, et al. (2017) Long-Fiber Carbon  
542 Nanotubes Replicate Asbestos-Induced Mesothelioma with Disruption of the Tumor  
543 Suppressor Gene *Cdkn2a* (*Ink4a/Arf*). *Curr Biol* 27: 3302–3314.e6. Available:  
544 <http://www.ncbi.nlm.nih.gov/pubmed/29112861>. Accessed 8 January 2018.
- 545 40. Rojas-Chapana J, Troszczyńska J, Firkowska I, Morszeck C, Giersig M (2005) Multi-walled  
546 carbon nanotubes for plasmid delivery into *Escherichia coli* cells. *Lab Chip* 5: 536–539.  
547 Available: <http://www.ncbi.nlm.nih.gov/pubmed/15856091>. Accessed 9 March 2016.
- 548 41. Yoshida N, Kodama K, Nakata K, Yamashita M, Miwa T (2002) *Escherichia coli* cells  
549 penetrated by chrysotile fibers are transformed to antibiotic resistance by incorporation of  
550 exogenous plasmid DNA. *Appl Microbiol Biotechnol* 60: 461–468. Available:  
551 <http://www.ncbi.nlm.nih.gov/pubmed/12466888>. Accessed 1 July 2013.



- 552 42. Rodríguez-Beltrán J, Elabed H, Gaddour K, Blázquez J, Rodríguez-Rojas A (2012) Simple  
553 DNA transformation in *Pseudomonas* based on the Yoshida effect. *J Microbiol Methods* 89:  
554 95–98. Available: <http://www.ncbi.nlm.nih.gov/pubmed/22405834>. Accessed 18 June 2013.
- 555 43. Terry KL, Karageorgi S, Shvetsov YB, Merritt MA, Lurie G, et al. (2013) Genital powder  
556 use and risk of ovarian cancer: a pooled analysis of 8,525 cases and 9,859 controls. *Cancer*  
557 *Prev Res (Phila)* 6: 811–821. Available: <http://www.ncbi.nlm.nih.gov/pubmed/23761272>.  
558 Accessed 18 November 2016.
- 559 44. Muscat JE, Huncharek MS (2008) Perineal talc use and ovarian cancer: a critical review. *Eur*  
560 *J Cancer Prev* 17: 139–146. Available: <http://www.ncbi.nlm.nih.gov/pubmed/18287871>.  
561 Accessed 18 November 2016.
- 562 45. Anderson EL, Sheehan PJ, Kalmes RM, Griffin JR (2016) Assessment of Health Risk from  
563 Historical Use of Cosmetic Talcum Powder. *Risk Anal*. Available:  
564 <http://doi.wiley.com/10.1111/risa.12664>. Accessed 18 November 2016.
- 565 46. Wu W-N, McKown LA (2004) In Vitro Drug Metabolite Profiling Using Hepatic S9 and  
566 Human Liver Microsomes. *Optimization in Drug Discovery*. Totowa, NJ: Humana Press. pp.  
567 163–184. Available: <http://link.springer.com/10.1385/1-59259-800-5:163>. Accessed 18  
568 November 2016.
- 569 47. Yong E (2013) Gut microbes keep species apart. *Nature*. Available:  
570 [http://www.nature.com/news/gut-microbes-keep-species-apart-1.13408?WT.ec\\_id=NEWS-](http://www.nature.com/news/gut-microbes-keep-species-apart-1.13408?WT.ec_id=NEWS-)  
571 [20130723](http://www.nature.com/news/gut-microbes-keep-species-apart-1.13408?WT.ec_id=NEWS-20130723). Accessed 5 April 2016.
- 572 48. Wings O (2007) A review of gastrolith function with implications for fossil vertebrates and a  
573 revised classification - *Acta Palaeontologica Polonica*. *Acta Palaeontol Pol* 52: 1–16.  
574 Available: <https://www.app.pan.pl/article/item/app52-001.html>. Accessed 5 April 2016.
- 575 49. Hansson GC (2012) Role of mucus layers in gut infection and inflammation. *Curr Opin*  
576 *Microbiol* 15: 57–62. Available: [/pmc/articles/PMC3716454/?report=abstract](http://www.ncbi.nlm.nih.gov/pmc/articles/PMC3716454/?report=abstract). Accessed 29  
577 October 2015.
- 578 50. Barrett JC, Lamb PW, Wiseman RW (1989) Multiple mechanisms for the carcinogenic  
579 effects of asbestos and other mineral fibers. *Environ Health Perspect* 81: 81–89. Available:  
580 <http://www.ncbi.nlm.nih.gov/pubmed/2667990>. Accessed 3 November 2016.
- 581 51. Foley-Comer AJ, Herrick SE, Al-Mishlab T, Prêle CM, Laurent GJ, et al. (2002) Evidence  
582 for incorporation of free-floating mesothelial cells as a mechanism of serosal healing. *J Cell*  
583 *Sci* 115: 1383–1389. Available: <http://www.ncbi.nlm.nih.gov/pubmed/11896186>. Accessed  
584 18 November 2016.
- 585 52. Mendes GP, Vieira PS, Lanceros-Méndez S, Kluskens LD, Mota M (2015) Transformation  
586 of *Escherichia coli* JM109 using pUC19 by the Yoshida effect. *J Microbiol Methods* 115: 1–  
587 5. Available: <http://linkinghub.elsevier.com/retrieve/pii/S0167701215001517>. Accessed 3  
588 November 2016.

- 589 53. Hall BM, Ma C-X, Liang P, Singh KK (2009) Fluctuation analysis CalculatOR: a web tool  
590 for the determination of mutation rate using Luria-Delbruck fluctuation analysis.  
591 Bioinformatics 25: 1564–1565. Available:  
592 <http://www.pubmedcentral.nih.gov/articlerender.fcgi?>  
593 [artid=2687991&tool=pmcentrez&rendertype=abstract](http://www.pubmedcentral.nih.gov/articlerender.fcgi?artid=2687991&tool=pmcentrez&rendertype=abstract). Accessed 1 May 2014.
- 594 54. Kaes C, Katz A, Hosseini MW (2000) Bipyridine: The Most Widely Used Ligand. A  
595 Review of Molecules Comprising at Least Two 2,2'-Bipyridine Units. Chem Rev 100: 3553–  
596 3590. Available: <http://dx.doi.org/10.1021/cr990376z>. Accessed 6 April 2016.
- 597 55. Schneider CA, Rasband WS, Eliceiri KW (2012) NIH Image to ImageJ: 25 years of image  
598 analysis. Nat Methods 9: 671–675. Available: <http://dx.doi.org/10.1038/nmeth.2089>.  
599 Accessed 9 July 2014.
- 600 56. Datsenko KA, Wanner BL (2000) One-step inactivation of chromosomal genes in  
601 Escherichia coli K-12 using PCR products. Proc Natl Acad Sci U S A 97: 6640–6645.  
602 Available: <http://www.ncbi.nlm.nih.gov/entrez/query.fcgi?>  
603 [cmd=Retrieve&db=PubMed&dopt=Citation&list\\_uids=10829079](http://www.ncbi.nlm.nih.gov/entrez/query.fcgi?cmd=Retrieve&db=PubMed&dopt=Citation&list_uids=10829079).
- 604 57. R Development Core Team (n.d.) R Development Core Team (2013). R: A language and  
605 environment for statistical computing. R Foundation for Statistical Computing, Vienna, Austria. I  
606 ISBN 3-900051-07-0, URL <http://www.R-project.org>.  
607  
608  
609  
610  
611  
612  
613  
614  
615  
616  
617  
618  
619  
620  
621  
622  
623  
624

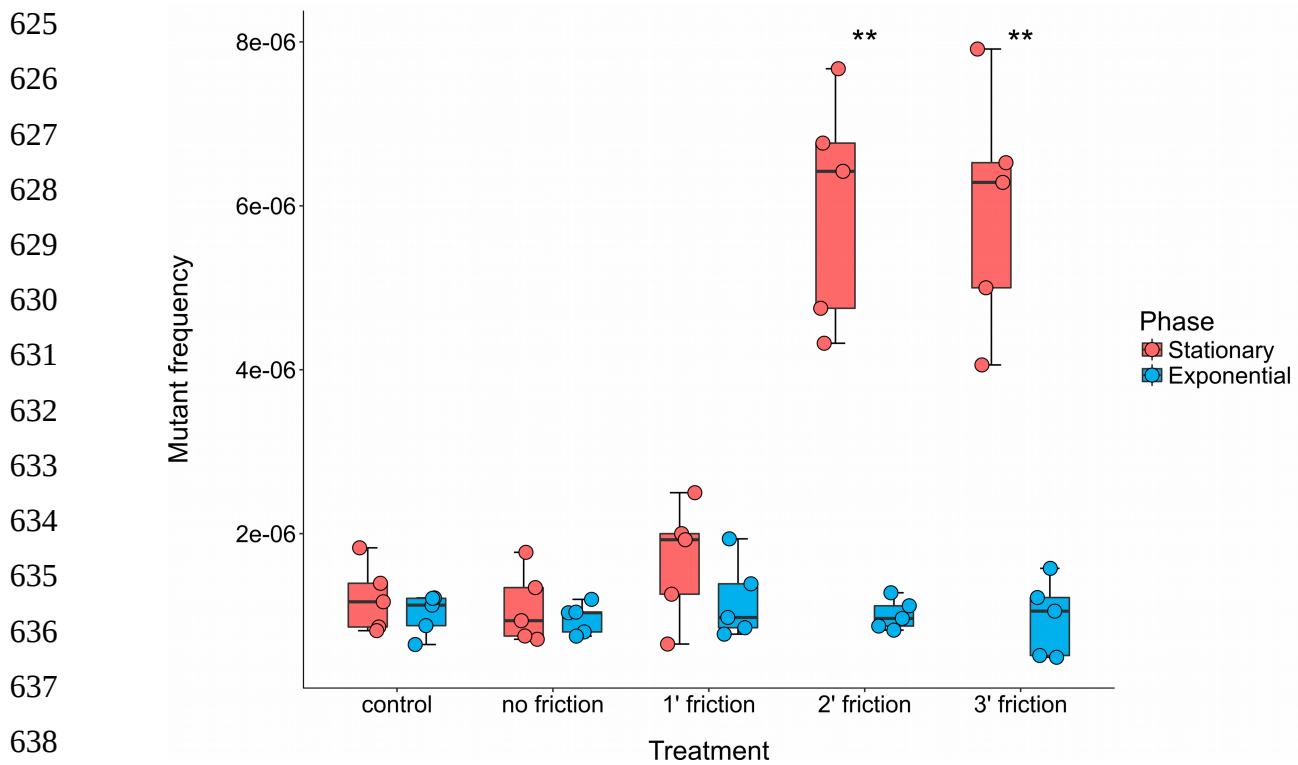

639  
640 **Fig 1. Sepiolite can be mutagenic after friction treatment only in stationary phase.** Box-plot of the mutant  
641 frequency induced by sepiolite treatment in *E. coli* MG1655 (A) stationary and (B) exponential phase cells. The x-axis  
642 indicates the experimental treatment (control, mixture of bacteria and sepiolite without friction force, and with friction  
643 force during one, two and three minutes). Asterisks represents significant difference; Mann-Whitney *U*:  $P < 0.01$ .

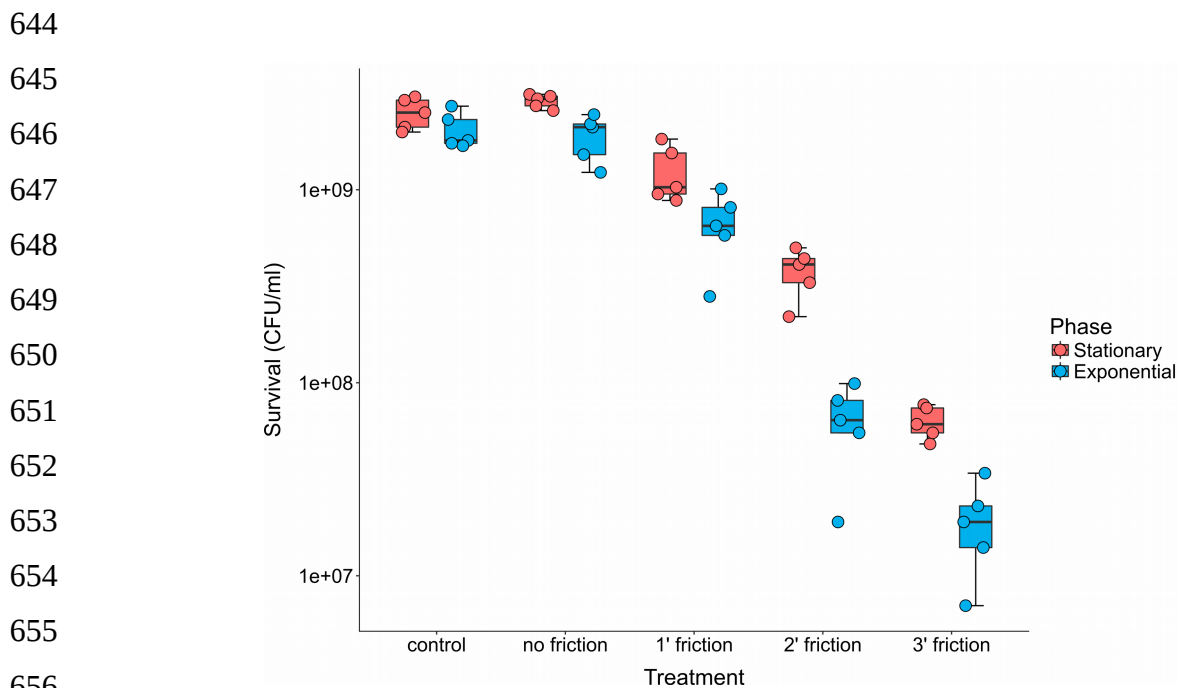

657 **Fig 2. The higher the time of friction, the smaller the cell viability.** Box-plot of the survival of *E. coli* MG1655 to  
658 the action of friction with sepiolite during one, two and three minutes of treatment. Groups with and without sepiolite  
659 gently spread with glass beads onto agar plates were used as controls.

660

661

662

663

664

665

666

667

668

669

670

671

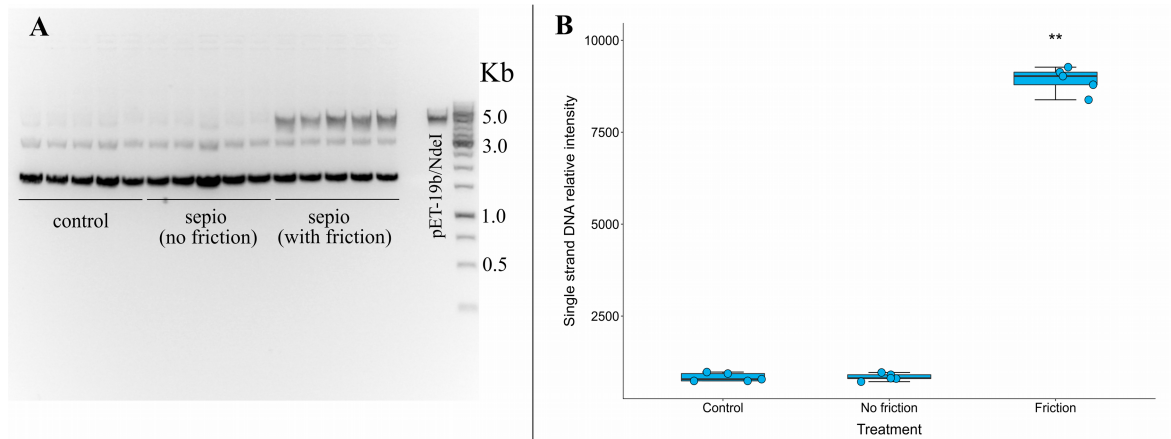

672 **Fig 3. Linear plasmid DNA molecules abundance is higher when friction forces are applied.** (A) Extraction of the  
 673 plasmid pET-19b from sepiolite-treated *E. coli* DH5 $\alpha$ , a *recA* deficient strain, during one minute (five extractions per  
 674 treatment). Note the enrichment in linearised plasmid DNA molecules from bacteria treated with sepiolite under two  
 675 minutes of friction applied in 1% agarose gel. (B) Box-plot of the abundance of single strand DNA molecules under  
 676 different experimental treatments (control, sepiolite without friction and sepiolite with friction). Plasmid pET-19b  
 677 digested with a single cut site enzyme NdeI was used as a control for the linear molecule migration rate and as a  
 678 reference to calculate relative intensities using a densitometry analysis. Asterisks represents significant difference;  
 679 Tukey HSD test:  $P < 0.01$ .

680

681

682

683

684

685

686

687

688

689

690

691

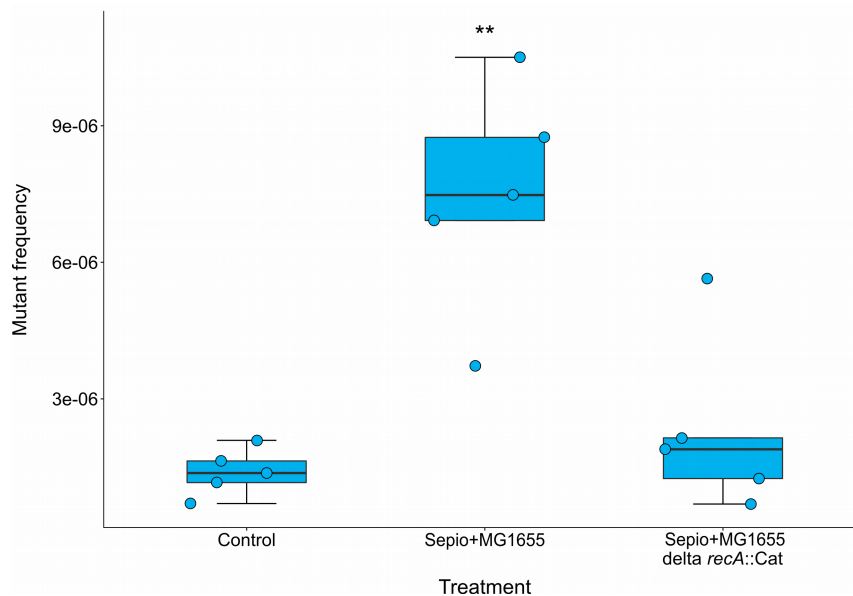

692

693 **Fig 4. Inactivation of the *recA* gene suppresses the mutagenic effect of sepiolite under friction in *E. coli* MG1655.**  
 694 Box-plot of the mutant frequency of *E. coli* MG1655 and DH5 $\alpha$  (derivative *recA* mutant) when treated with sepiolite  
 695 during two minutes. Asterisks represents significant difference; Mann-Whitney  $U$ :  $P < 0.01$ .

696  
697  
698  
699  
700  
701  
702  
703  
704  
705  
706  
707  
708

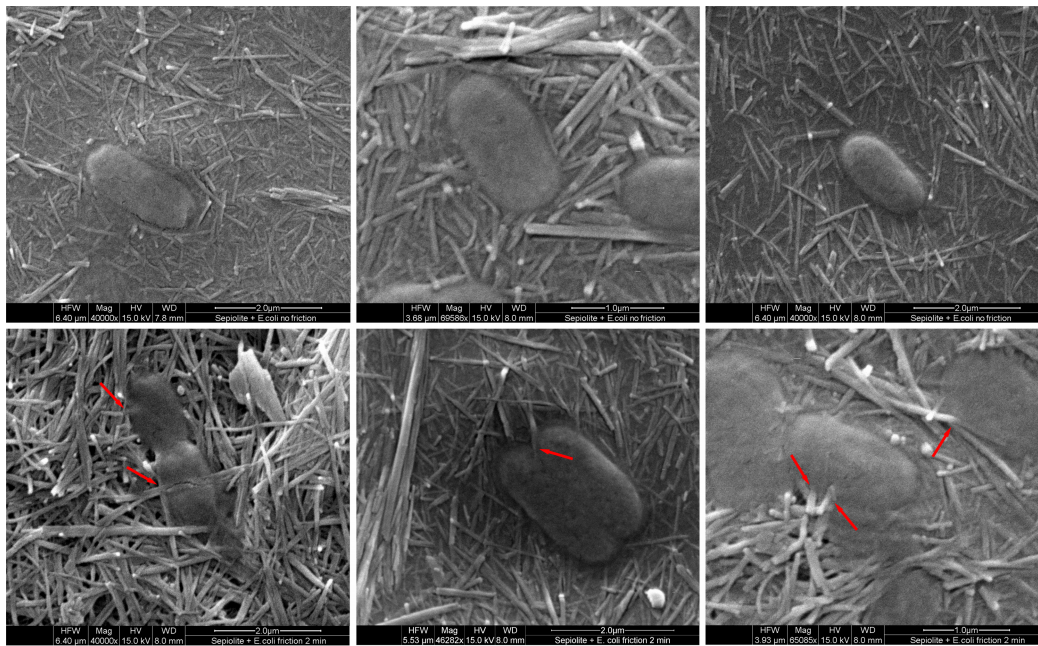

709 **Fig 5. Sepiolite can penetrate bacterial cells when friction forces are applied.** SEM of stationary phase *E. coli*  
710 MG1655 treated with sepiolite. Red arrows represent potential sites of sepiolite fibre penetration. Bacteria were  
711 observed with different magnifications ranging from 40 000X to 70 000X.

712  
713  
714  
715  
716  
717  
718  
719  
720  
721  
722  
723  
724  
725  
726

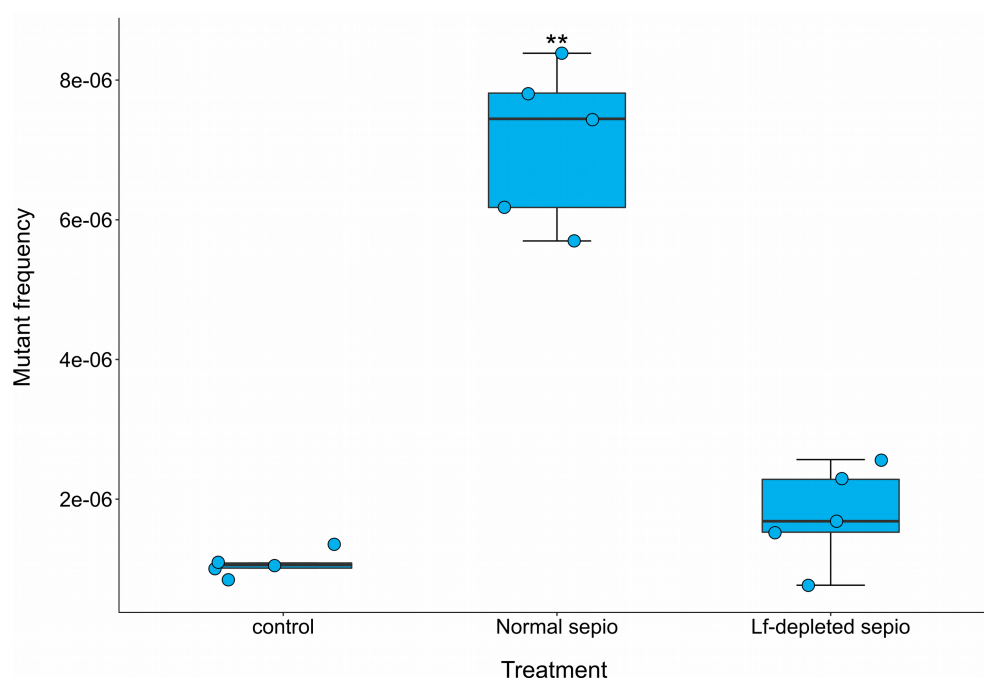

727 **Fig 6. Removal of sepiolite fibres longer than 1 µm decreases fibre-induced mutagenesis to the level of the**  
728 **control.** Box-plot of the mutant frequency of *E. coli* MG1655 when sepiolite fibres longer than 1 µm were removed in  
729 mutagenesis experiments (Lf-depleted sepiolite). Dry and reconstituted sepiolite (normal sepiolite) and bacterial cells

730 (labelled as control) with no sepiolite were used to compare the effects of long fibre removal. Asterisks represents  
731 significant difference; Mann-Whitney  $U$ :  $P < 0.01$ .

732

733

734

735

736

737

738

739

740

741

742

743

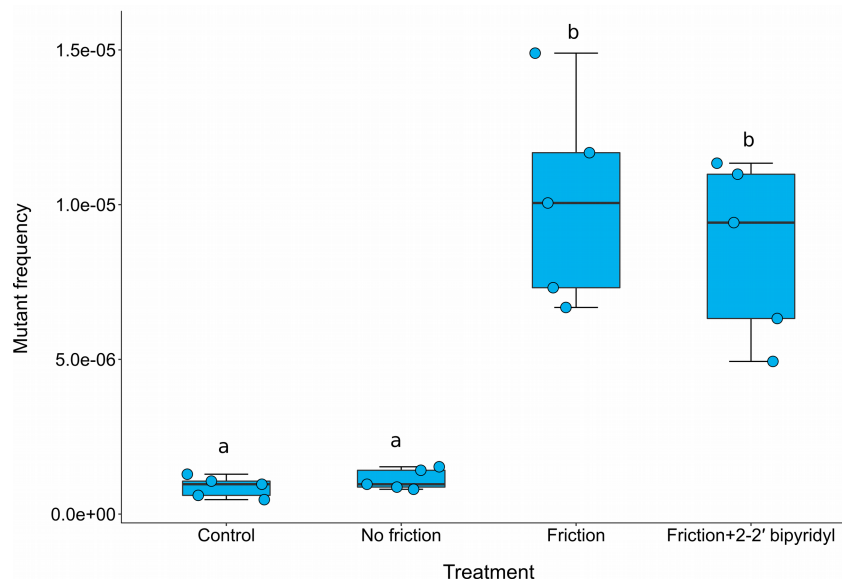

744 **Fig 7. Asbestos can increase the mutant frequency of *E. coli* after friction around one order of magnitude.** Box-  
745 plot of mutant frequency induced by asbestos (crocidolite fibres) treatment in *E. coli* MG1655. Asterisk represents  
746 significant difference; Mann-Whitney  $U$ :  $P < 0.05$ . Equal letters represent no differences while different ones represent  
747 significant differences.

748

749

750

751

752

753

754

755

756

757

758

759

760

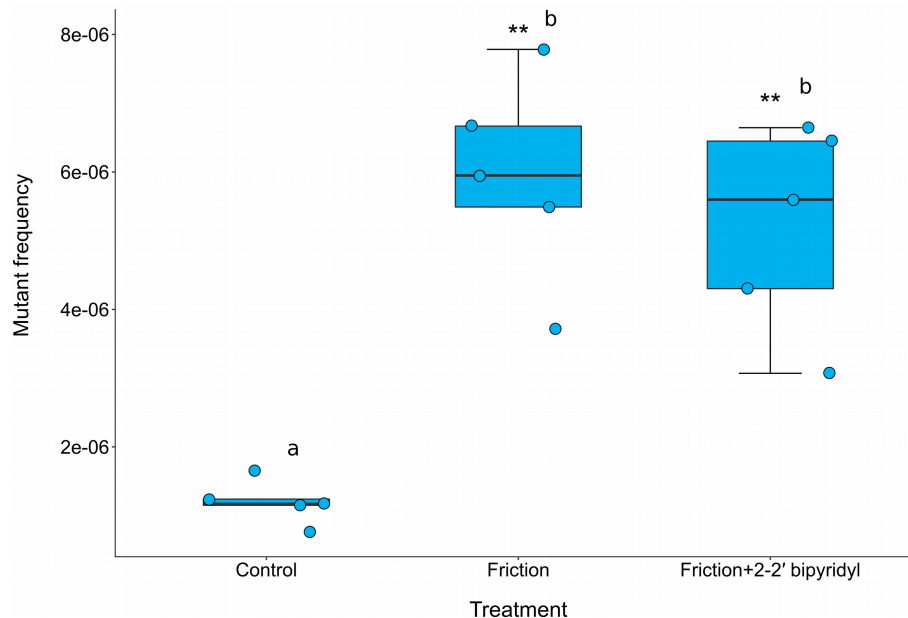

761 **Fig S1. Addition of a chelating agent (2-2' bipyridyl) does not significantly suppress or diminish the mutagenic**  
762 **effect of sepiolite.** Box-plot of mutant frequency of *E. coli* MG1655 when added 2-2' bipyridyl as chelating agent.  
763 Asterisks represents significant difference; Mann-Whitney  $U$ :  $P < 0.01$ . Equal letters represent no differences while  
764 different ones represent significant differences.

765  
766  
767  
768  
769  
770  
771  
772  
773  
774  
775  
776  
777  
778  
779

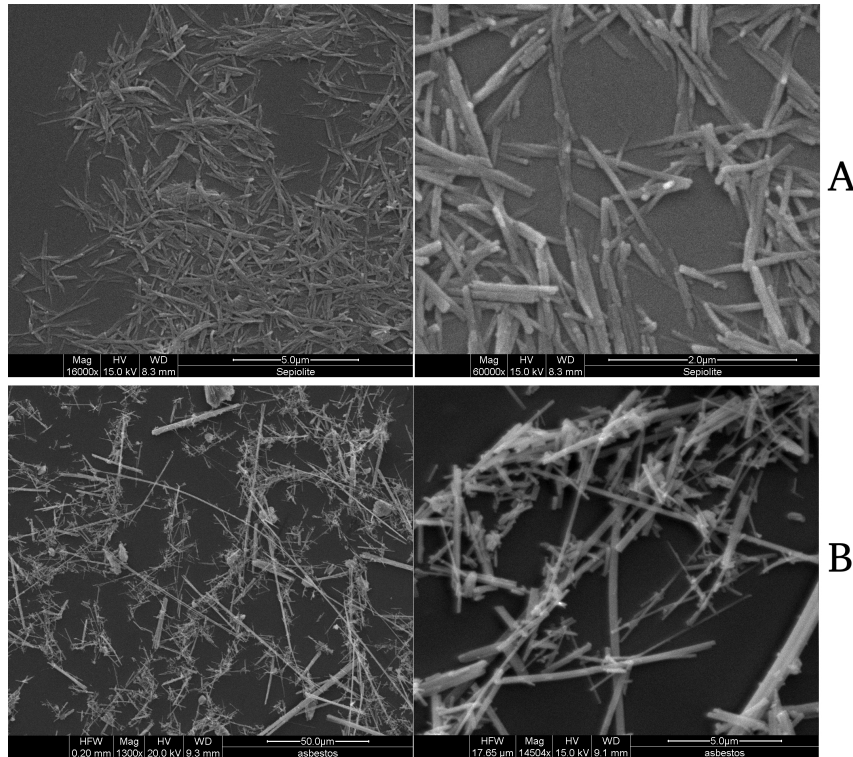

780 **Fig S2. Visualisation of sepiolite and asbestos fibres under SEM.** SEM examination of (A) sepiolite fibres and (B)  
781 asbestos. Fibres were observed at different magnifications as indicated in the pictures.
